# Supplementary material
Source: PubMed Central journal article supplement (PMC7654358)
Supplement: mmc1.pdf [file mmc1.pdf]

**Supplementary Material**

**Detection of SARS-CoV-2 in wastewater in Japan during a COVID-19 outbreak.**

Akihiko Hata<sup>1</sup>, Hiroe Hara-Yamamura<sup>2</sup>, Yuno Meuchi<sup>1</sup>, Shota Imai<sup>1</sup>, Ryo Honda<sup>2,3,\*</sup>

<sup>1</sup> *Faculty of Engineering, Toyama Prefectural University*

<sup>2</sup> *Faculty of Geosciences and Civil Engineering, Kanazawa University,*

<sup>3</sup> *Research Center for Environmental Quality Management, Graduate School of Engineering, Kyoto University*

**\*Corresponding author:** Ryo Honda

**Mailing address:** Faculty of Geosciences and Civil Engineering, Kanazawa University,  
Kakuma-machi, Kanazawa 920-1192, Japan

**Tel:** +81-76-264-6393

**TABLE**  
**Table S1.** Characteristics of the WWTPs used in this study.

| WWTP | Prefecture | Population served by WWTP | Sewered population rate (%) | Maximum treatment capacity (m <sup>3</sup> /d) | Actual treatment capacity (m <sup>3</sup> /d) |
|------|------------|---------------------------|-----------------------------|------------------------------------------------|-----------------------------------------------|
| A    | Ishikawa   | 31,501                    | 92.9                        | 12,800                                         | 9,348                                         |
| B    | Ishikawa   | 112,396                   | 91.4                        | 53,300                                         | 37,106                                        |
| C    | Ishikawa   | 150,223                   | 98.9                        | 156,000                                        | 86,446                                        |
| D    | Toyama     | 169,400                   | 91.1                        | 82,500                                         | 55,639                                        |
| E    | Toyama     | 233,480                   | 97.5                        | 143,500                                        | 109,500                                       |

**Table S2.** Physico-chemical characteristics of influent wastewater in each WWTP during the study period. The data were provided by each WWTP.

| WWTP                 |           | Water temperature °C | pH -      | SS mg/L       | COD mg/L      |
|----------------------|-----------|----------------------|-----------|---------------|---------------|
| A <sup>a</sup>       | Ave. ± SD | 17.7 ± 1.6           | 7.7 ± 0.1 | 115.9 ± 19.4  | 65.9 ± 11.7   |
| (March 12 – May 28)  | (Min-Max) | (16.0-21.5)          | (7.7-7.9) | (89.0-152.0)  | (44.4-80.4)   |
| B <sup>b</sup>       | Ave. ± SD | 18.3 ± 1.5           | 7.9 ± 0.0 | 179.7 ± 22.1  | 155.3 ± 25.8  |
| (March 5 – May 28)   | (Min-Max) | (16.6-21.1)          | (7.9-8.0) | (142.0-212.0) | (118.0-222.0) |
| C <sup>c</sup>       | Ave. ± SD | N.A.                 | N.A.      | N.A.          | N.A.          |
| (March 6 - April 21) | (Min-Max) |                      |           |               |               |
| D                    | Ave. ± SD | 22.0 ± 1.6           | 7.1 ± 0.1 | 100.7 ± 48.0  | 60.5 ± 12.7   |
| (March 6 – May 29)   | (Min-Max) | (19.5-24.4)          | (6.8-7.2) | (40.0-221.0)  | (43.0-83.0)   |
| E                    | Ave. ± SD | 21.1 ± 0.5           | 7.2 ± 0.0 | 300.0 ± 10.0  | 113.3 ± 5.8   |
| (May 15 – May 29)    | (Min-Max) | (20.7-21.7)          | (7.2-7.2) | (290.0-310.0) | (110.0-120.0) |

<sup>a</sup>: The parameters were measured the day before our sample collection.

<sup>b</sup>: COD was measured the day before our sample collection, while other parameters were measured on the day of our sample collection.

<sup>c</sup>: The data were not available (N.A.).

**FIGURE**

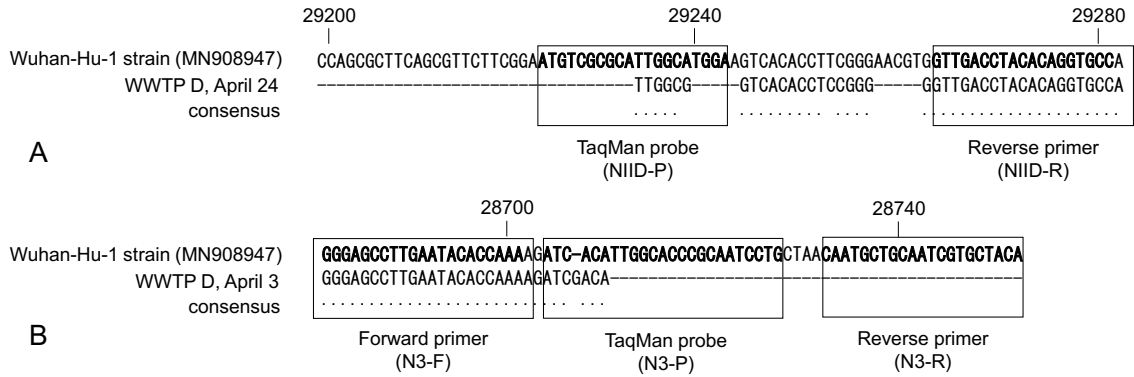

**Figure S1.** Determined sequence of a qRT-PCR amplicon obtained from a sample at WWTP D on April 3 by N3 assay (A) and on April 24 by NIID assay (B). The sequence was aligned with a reference strain (Wuhan-Hu-1 strain, genbank accession number: MN908947).
